# Supplementary material for: Single-nucleus transcriptomic landscape of primate hippocampal aging
Source: PubMed Central journal article supplement (PMC8403220; doi:10.1007/s13238-021-00852-9), 2021-05-30

## Supplementary Figure Legends

### Figure S1. Establishment of the single-nucleus transcriptomic atlas of NHP hippocampal aging.

- (A) Sample information of monkeys used in this study.
- (B) Staining of cell nuclei by Hoechst 33342 in DG, CA1 and CA3 regions of the hippocampus from young and old monkeys. Representative images are shown on the left; quantitative data for the relative cell density in indicated regions are shown as means  $\pm$  SEM on the right. Cell density is quantified as fold changes in the old DG, CA1 and CA3 regions vs. in young counterparts. Scale bar, 50  $\mu$ m. Young, n = 8; old, n = 8 monkeys. ns, not significant.
- (C) Sequencing information of the snRNA-seq.
- (D) UMAP plots showing distribution of cells from different groups of monkey hippocampus. YM, young male; YF, young female; OM, old male; OF, old female.

### Figure S2. Age-associated gene expression analysis of monkey hippocampus across different cell types.

- (A) Violin plots showing the expression levels of canonical marker genes of the indicated cell types in monkey hippocampus from young and old groups.
- (B) Sankey plot showing the numbers of overlapped genes between top 30 cell-type-specific genes and disease-related genes and genes from Aging Atlas (<https://bigd.big.ac.cn/aging>). AA, Aging Atlas; LD, learning disorders; MD, memory disorders; AD, Alzheimer's Disease; PD, Parkinson's Disease.
- (C) Line plots showing the numbers of aging-related DEGs of different cell types in monkey hippocampus from male, female, and both groups.
- (D) Heatmap showing overlapped genes between aging-related DEGs and genes from Aging Atlas.
- (E) Network plot showing the numbers of changed cell-cell interactions between indicated cell types in monkey hippocampus. Edge color from blue to red indicates the number from low to high.
- (F) Bar plots showing the number of young-specific and old-specific cell-cell interactions between the indicated cell type with other cell types in monkey hippocampus.

### Figure S3. Aging-associated gene expression alterations along the trajectories of neurogenesis.

- (A) Pseudotime analysis of neuronal lineage cells in monkey hippocampus. The arrows indicate the directions of differentiation trajectories. The color from dark blue to light blue indicates the pseudotime from the beginning to the end state.
- (B) Pseudotime analysis showing the expression levels of indicated genes along the trajectory of neurogenesis in monkey hippocampus.
- (C) Box plot showing the proportions of TAPCs in indicated cell cycle phases in monkey hippocampus from young and old groups.

**(D)** Heatmap showing the target genes (column) related to learning or memory with their indicated upstream regulators (row). The genes in red represent the upregulated regulators, the blue, in turn represent the downregulated ones.

**Figure S4. Cellular and molecular changes of neurogenic niche during monkey hippocampal aging.**

**(A)** Pseudotime analysis of OPC and OL in the monkey hippocampus. The arrows indicate the directions of differentiation trajectories. The color from dark blue to light blue indicates the pseudotime from the beginning to the end state.

**(B)** Pseudotime analysis showing the expression levels of indicated genes along the trajectory from OPC to OL of the monkey hippocampus. The points are colored by cell type (left) and cell state (right).

**(C)** Box plots (bottom) showing the proportion of different subtypes of OL in the hippocampus from young and old groups.

**(D)** Violin plots showing SASP gene set scores in different cell types of monkey hippocampus from young and old groups.

**(E)** Immunohistochemical staining of TNF- $\alpha$  in the CA3 region of hippocampus from young and old monkeys. Representative images are shown on the left; signal intensity of TNF $\alpha$  is quantified as fold changes in the old CA3 regions vs. in young counterparts, shown as means  $\pm$  SEM on the right. Scale bars, 20  $\mu$ m and 10  $\mu$ m (zoomed-in images). Young, n = 8; old, n = 8 monkeys. ns, not significant.

**Supplementary Tables**

**Table S1.** Marker genes and their upstream transcription factors across different cell types of monkey hippocampus.

**Table S2.** Differentially expressed genes across different cell types in monkey hippocampus between young and old groups.

**Table S3.** Young-specific and old-specific cell-cell interaction pairs between cell types in monkey hippocampus.

**Table S4.** Top 500 differentially expressed genes along the trajectories of the neurogenic lineage and oligodendrocyte lineage.

**Table S5.** Transcription factors regulating the aging-related differentially expressed gene of NSC and TAPC in monkey hippocampus.

**Table S6.** Gene lists used in this study.

**Figure S1**

**A**

| No. | Species                    | Sex    | Animal Symbol | Age (Year) |
|-----|----------------------------|--------|---------------|------------|
| 1   | <i>Macaca fascicularis</i> | Male   | YM1           | ~5         |
| 2   | <i>Macaca fascicularis</i> | Male   | YM2           | ~5         |
| 3   | <i>Macaca fascicularis</i> | Male   | YM3           | ~6         |
| 4   | <i>Macaca fascicularis</i> | Male   | YM4           | ~6         |
| 5   | <i>Macaca fascicularis</i> | Female | YF1           | ~5         |
| 6   | <i>Macaca fascicularis</i> | Female | YF2           | ~5         |
| 7   | <i>Macaca fascicularis</i> | Female | YF3           | ~5         |
| 8   | <i>Macaca fascicularis</i> | Female | YF4           | ~4         |
| 9   | <i>Macaca fascicularis</i> | Male   | OM1           | ~18        |
| 10  | <i>Macaca fascicularis</i> | Male   | OM2           | ~19        |
| 11  | <i>Macaca fascicularis</i> | Male   | OM3           | ~20        |
| 12  | <i>Macaca fascicularis</i> | Male   | OM4           | ~21        |
| 13  | <i>Macaca fascicularis</i> | Female | OF1           | ~18        |
| 14  | <i>Macaca fascicularis</i> | Female | OF2           | ~19        |
| 15  | <i>Macaca fascicularis</i> | Female | OF3           | ~19        |
| 16  | <i>Macaca fascicularis</i> | Female | OF4           | ~20        |

**B**

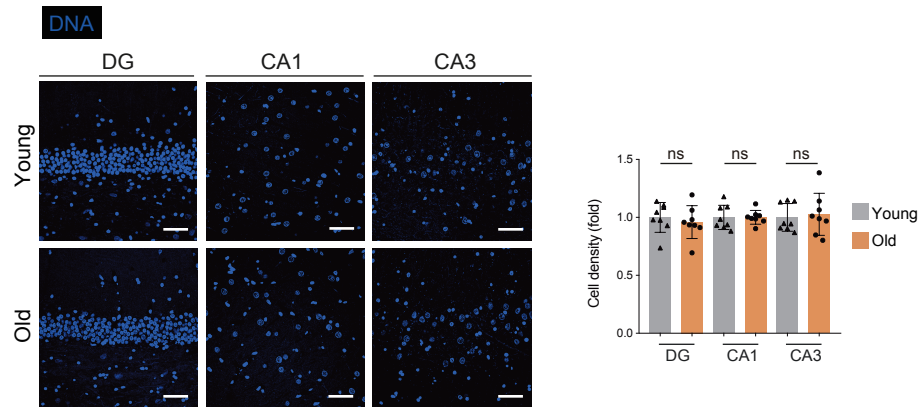

**C**

| Animal Symbol | Sequencing saturation (%) | Mapping rate to transcriptome (%) | Doublet rate (%) |
|---------------|---------------------------|-----------------------------------|------------------|
| YM1           | 70.0                      | 35.1                              | 7.0              |
| YM2           | 87.3                      | 30.1                              | 1.7              |
| YM3           | 73.2                      | 33.8                              | 3.9              |
| YM4           | 73.1                      | 40.3                              | 6.7              |
| YF2           | 70.6                      | 42.5                              | 4.9              |
| YF3           | 72.8                      | 43.3                              | 4.1              |
| YF4           | 87.6                      | 40.4                              | 4.7              |
| OM1           | 68.7                      | 35.6                              | 4.8              |
| OM2           | 85.0                      | 39.8                              | 3.2              |
| OM3           | 73.8                      | 31.0                              | 5.8              |
| OM4           | 78.1                      | 48.3                              | 7.0              |
| OF1           | 71.2                      | 39.0                              | 7.1              |
| OF2           | 71.5                      | 42.3                              | 5.5              |
| OF3           | 66.5                      | 31.4                              | 6.9              |
| OF4           | 71.8                      | 36.9                              | 4.0              |

**D**

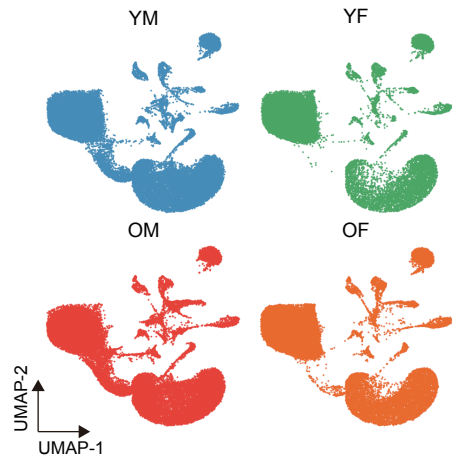

**Figure S2**

**A**

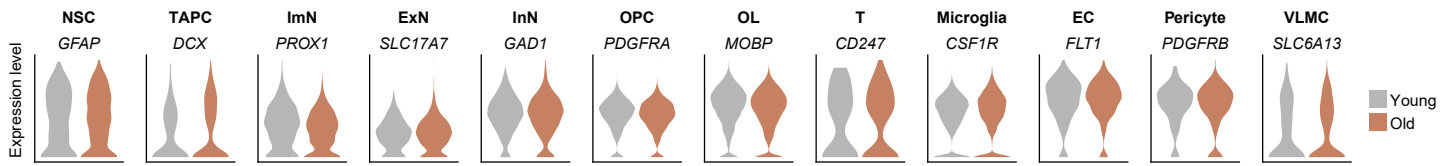

**B**

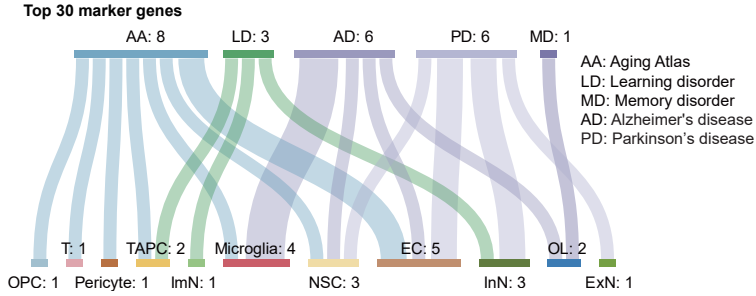

**C**

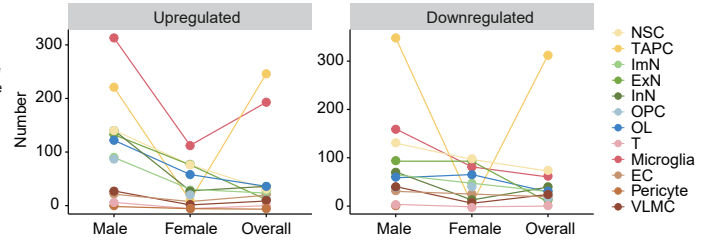

**D**

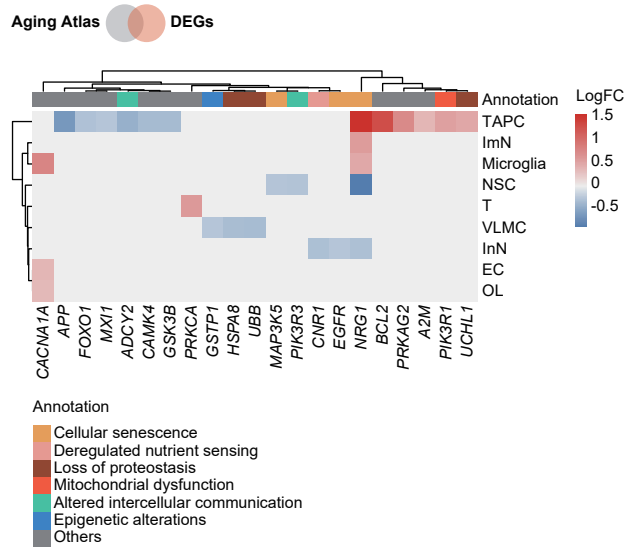

**E**

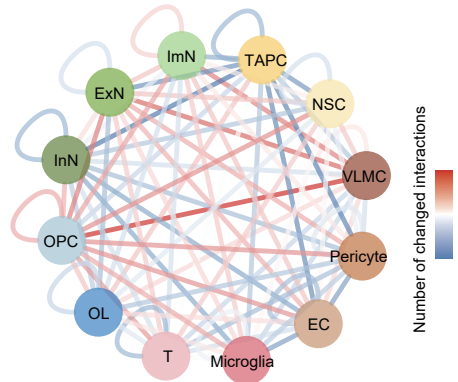

**F**

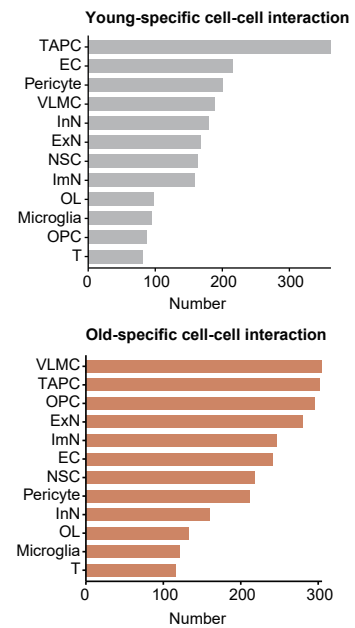



**Figure S3**

**A**

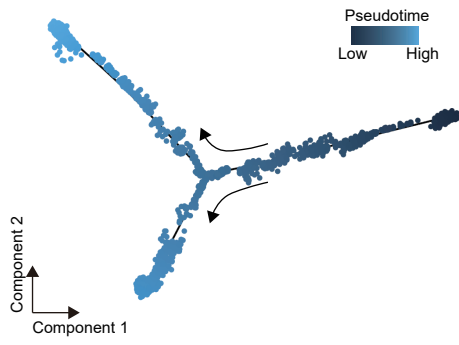

**B**

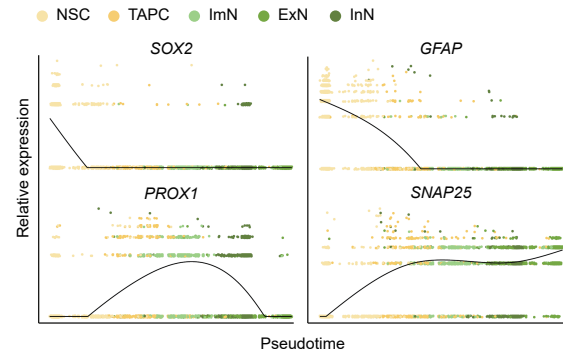

**C**

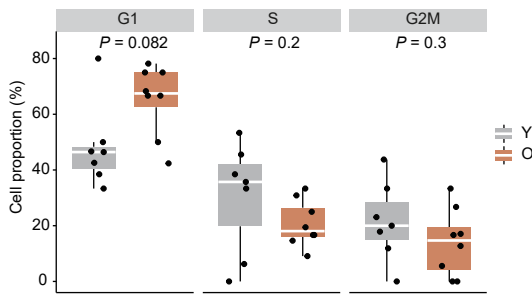

**D**

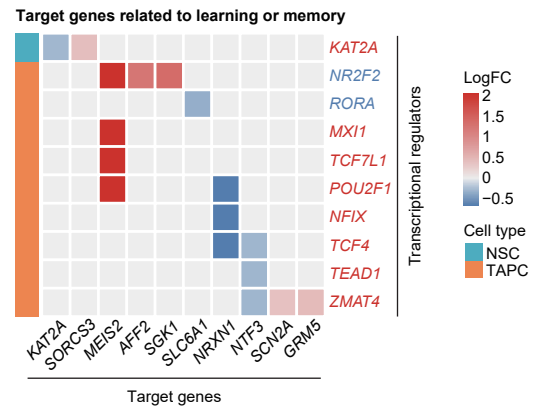

**Figure S4**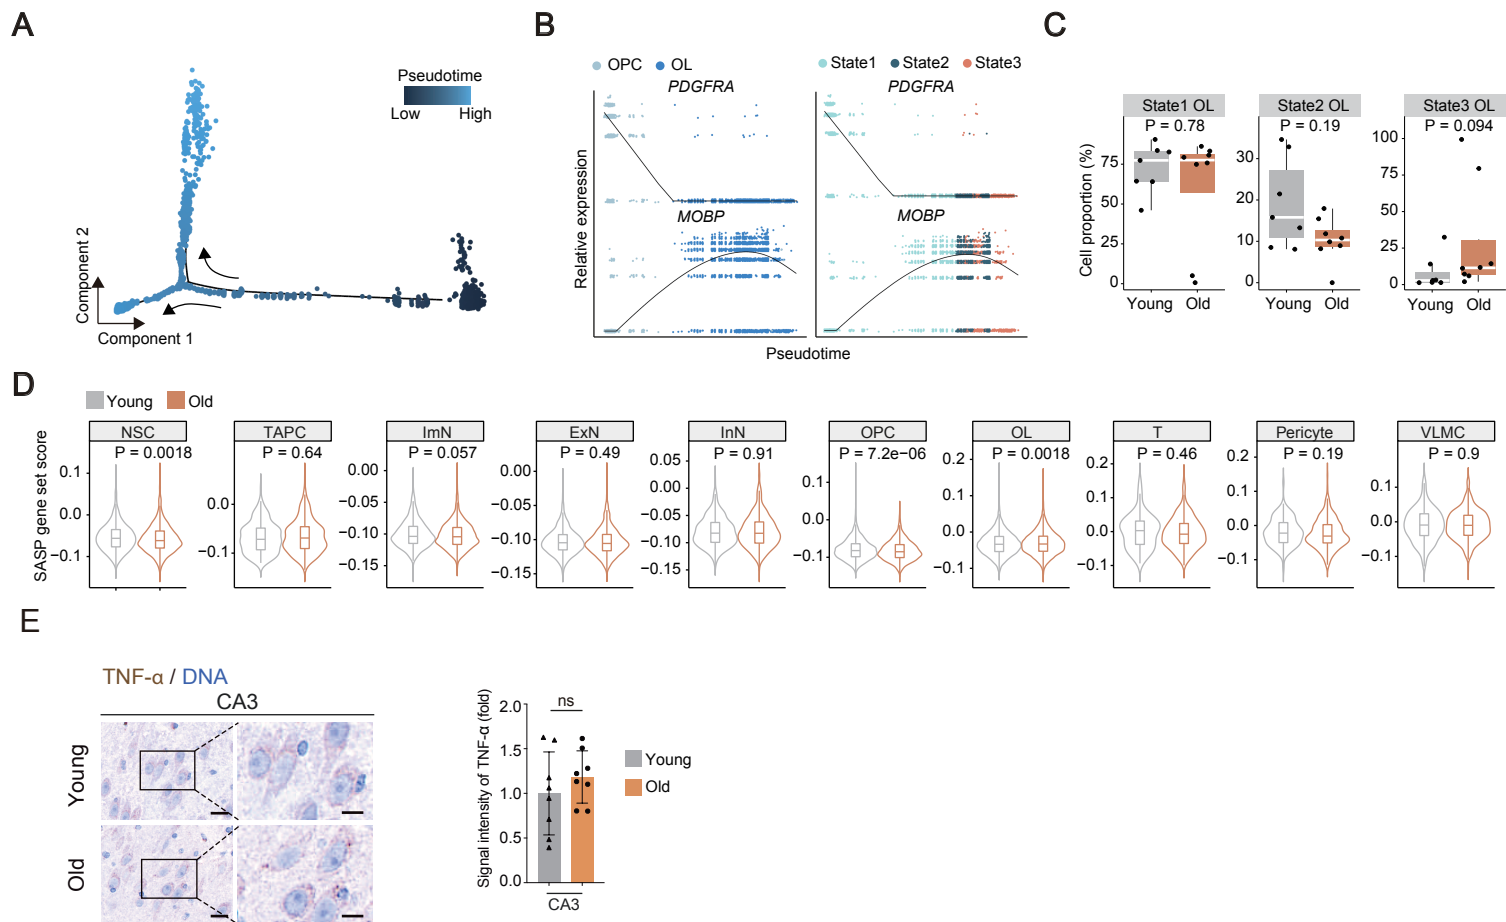

Supplement: 13238_2021_852_MOESM1_ESM.pdf [file 13238_2021_852_MOESM1_ESM.pdf]
